# Supplementary material for: Large-scale synthesis of N-doped carbon spherical shells as high-performance cathode materials for Li–X (X = O2, S, Se) batteries
Source: Royal Society of Chemistry journal article supplement (doi:10.1039/d4ta02466d), 2024-01-01
Supplement: d4ta02466d1.pdf [file d4ta02466d1.pdf]

# Support information

## **Large scale synthesis of N-doped carbon spherical shells as high-performance cathode materials for Li-X (X=O<sub>2</sub>, S, Se) batteries**

*Kailing sun<sup>a</sup>, Xiaocong Deng<sup>a</sup>, Xian Huang<sup>a</sup>, Shijun Liao<sup>b</sup>, Limei Liu<sup>a</sup>, Mei Yang<sup>\*c</sup>, Tongye Wei<sup>\*a</sup>,*

*<sup>a</sup> Department of Physics & Hunan Institute of Advanced Sensing and Information Technology, Xiangtan University, Xiangtan 411105, P.R. China*

*<sup>b</sup> The Key Laboratory of Fuel Cell Technology of Guangdong Province, School of Chemistry and Chemical Engineering, South China University of Technology, Guangzhou 510641, China.*

*<sup>c</sup> Key Laboratory of Polymeric Materials & Application Technology of Hunan Province, Key Laboratory of Advanced Functional Polymeric Materials of College of Hunan Province, and Key Lab of Environment-Friendly Chemistry and Application in Ministry of Education, Xiangtan University, Xiangtan 411105, Hunan Province, P. R. China.*

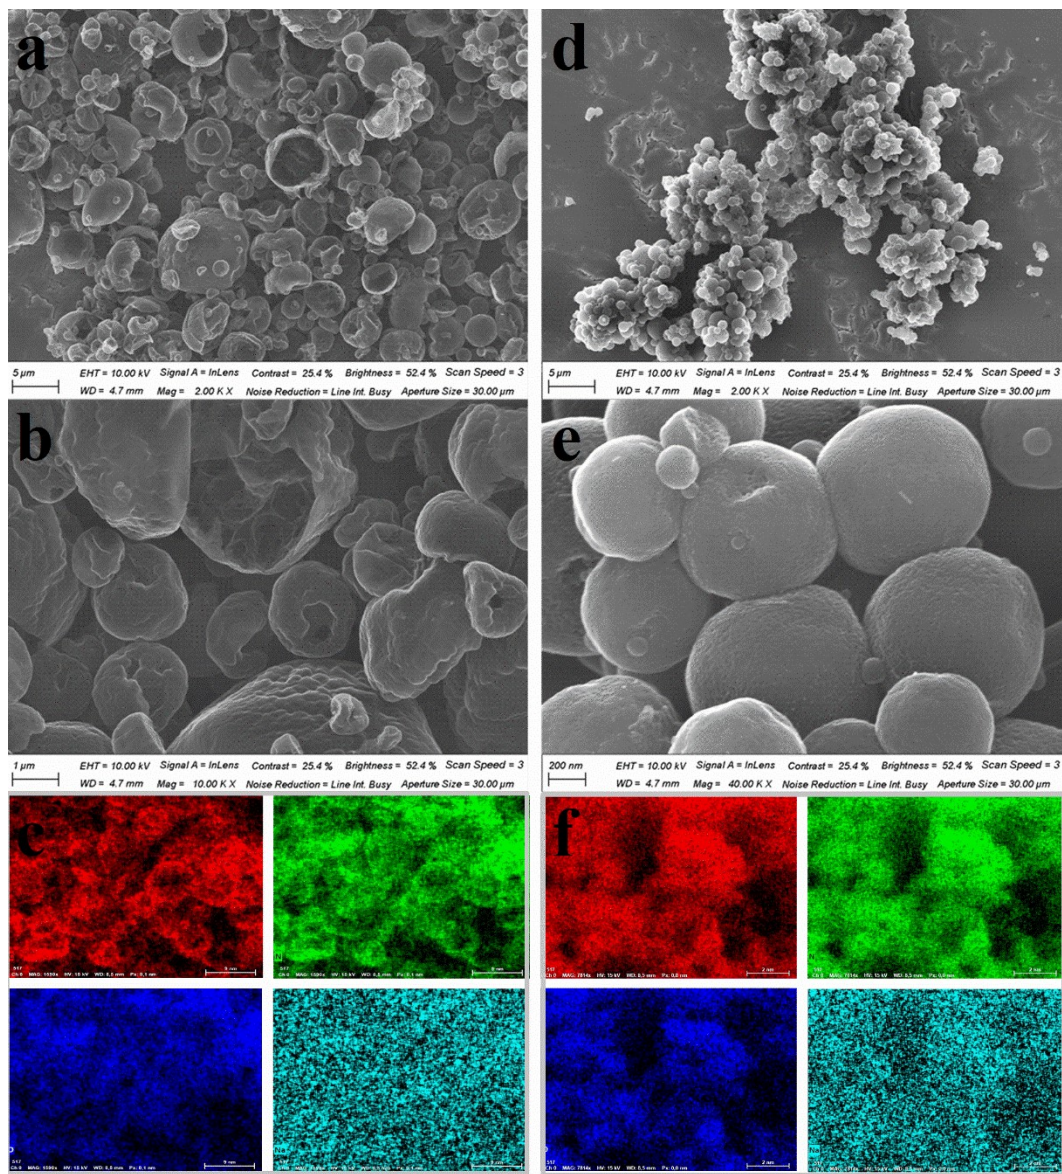

**Figure S1. a, b) The SEM image, c) the element mapping of C-N; d, e) The SEM image, f) the element mapping of C-F.**

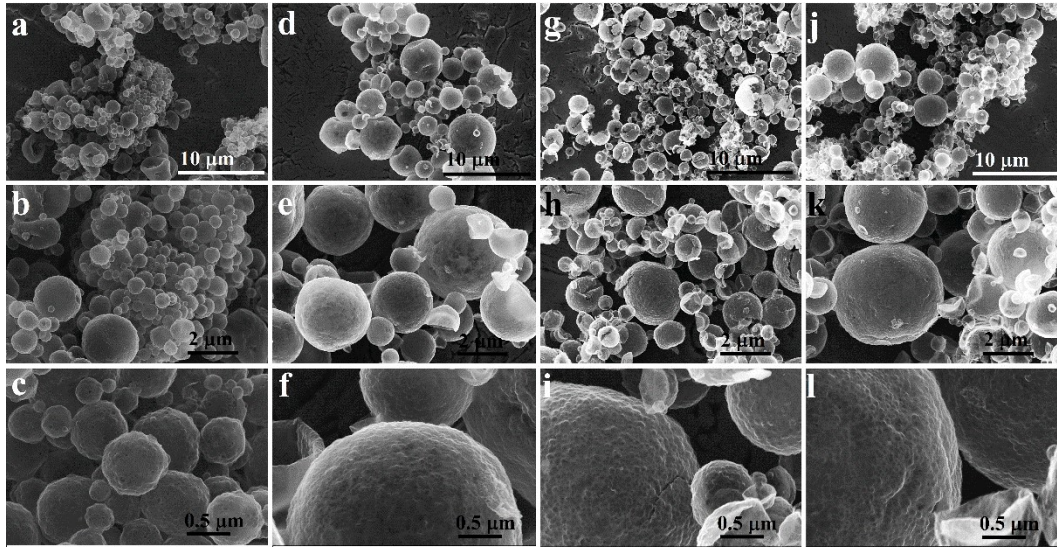

Figure S2. a, b, c) The SEM image of C-FN; d, e, f) C-FN<sub>1/2</sub>; g, h, i) C-FN<sub>1/4</sub>; j, k, l) C-FN<sub>1/10</sub>.

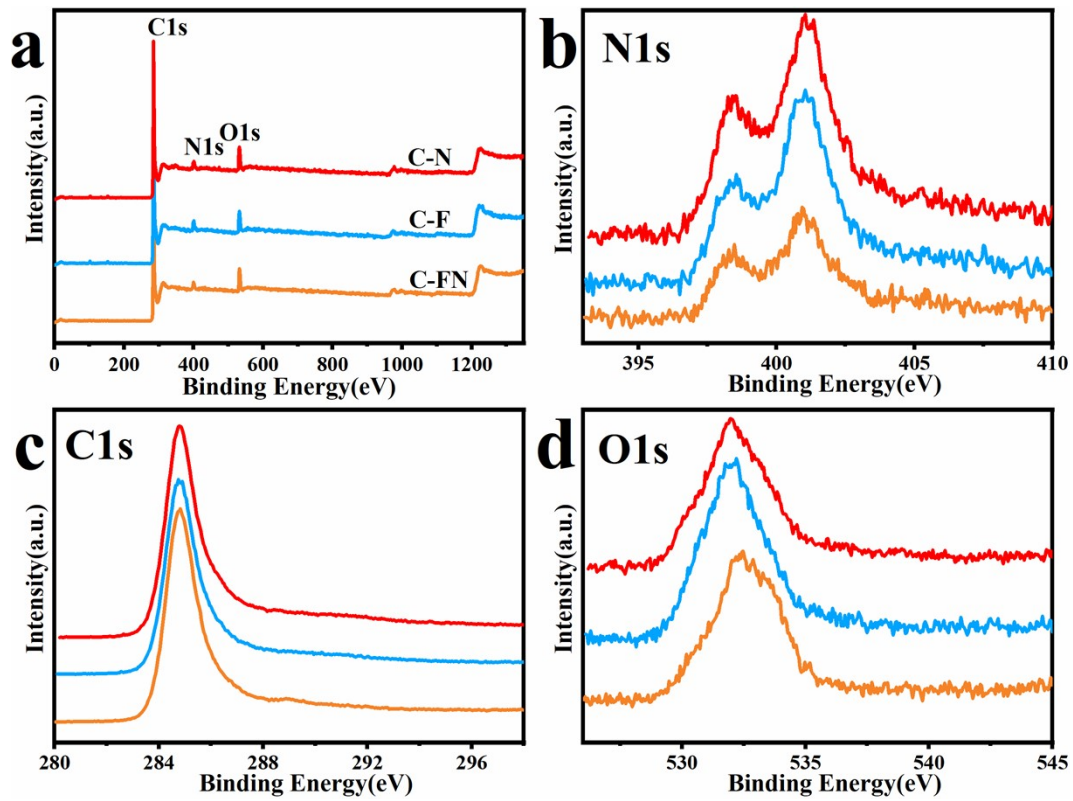

Figure S3. a) XPS survey spectra; b) high-resolution XPS of N 1s, c) C1s, d) O1s of C-F, C-N and C-FN.



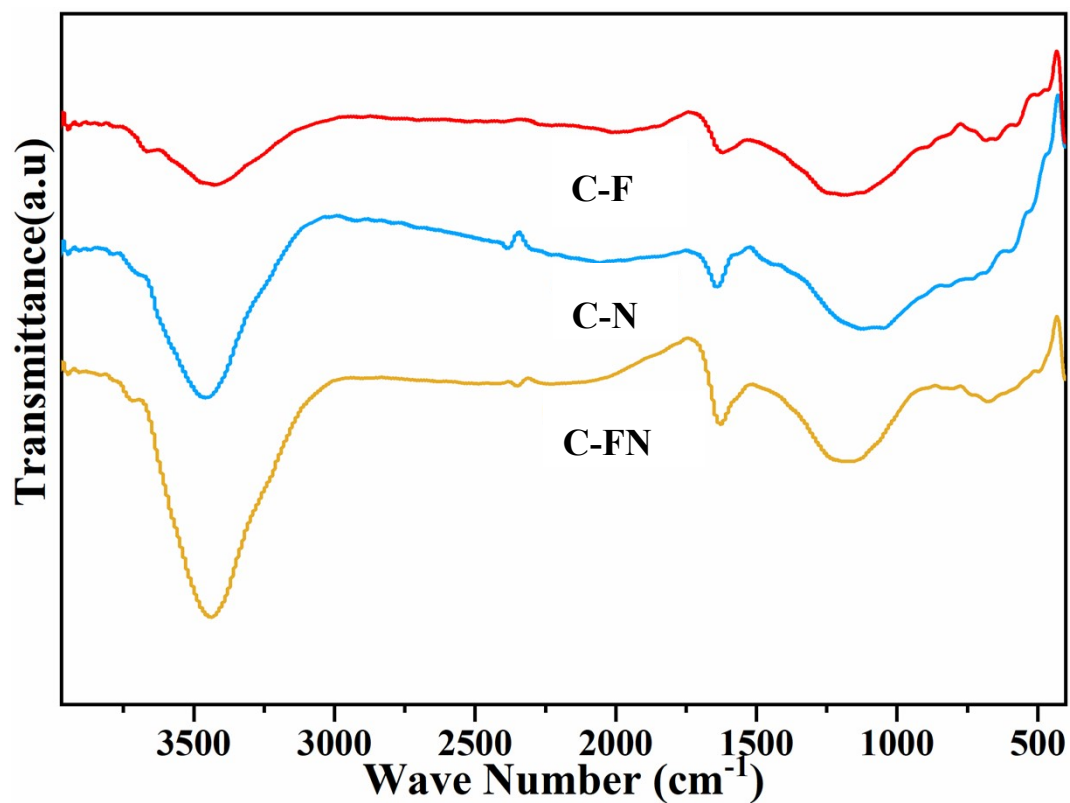

Figure S4. The Fourier Transform infrared reflection (FTIR) spectra of the prepared materials.

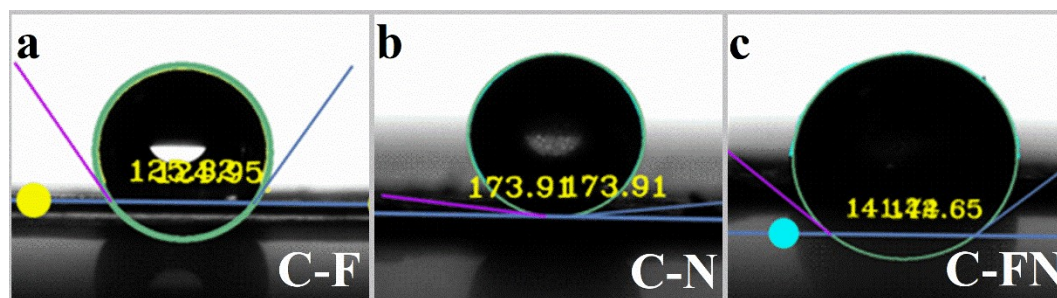

FigureS5. The water droplet contact angle on the surface of the Li-O cathode base on C-F, C-N and C-FN.

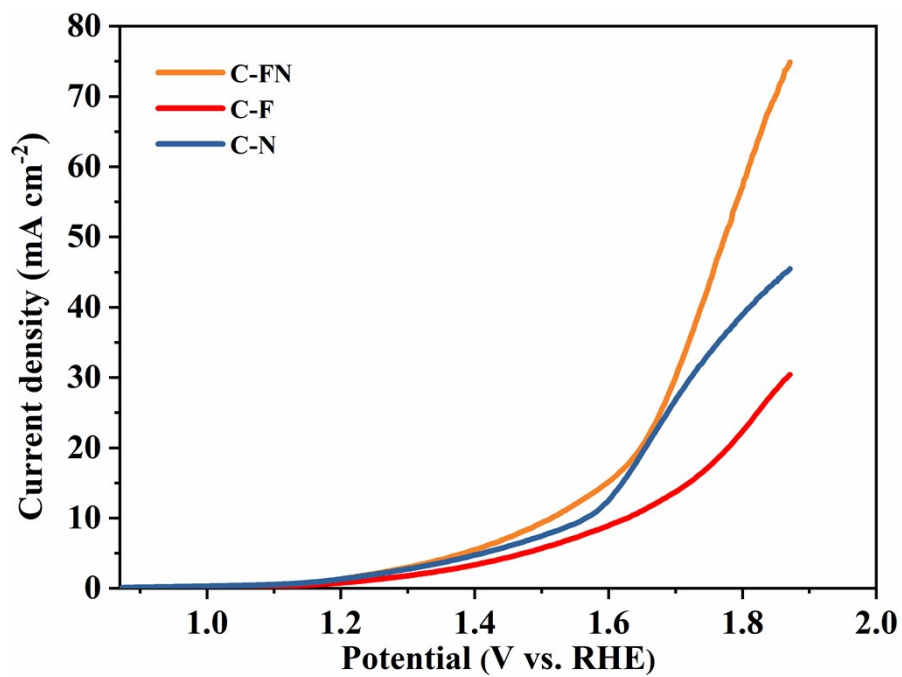

Figure S6. Linear sweep voltammetry (LSV) curves of the C-FN, C-F and C-N at 10 mA cm<sup>-2</sup>.

### Ion diffusion coefficient test

To further study the lithium-ion coefficient in the prepared cathodes, the  $D_{Li^+}$  can be calculated according to the following equation:

$$D_{Li^+} = \frac{R^2 T^2}{2A^2 n^4 F^4 C^2 \sigma^2}$$

Where  $D_{Li^+}$  represents the lithium-ion diffusion coefficient ( $\text{cm}^2 \text{s}^{-1}$ ),  $R$  represents the gas constant ( $8.314 \text{ J mol}^{-1} \text{K}^{-1}$ ),  $T$  represents the absolute temperature ( $298.15 \text{ K}$ ),  $A$  represents the electrode area,  $n$  represents the number of electrons involved in the redox process,  $C$  represents the shuttle concentration,  $F$  represents the Faraday constant ( $96500 \text{ C mol}^{-1}$ ), and  $\sigma$  represents the Warburg factor ( $\Omega \text{ s}^{-1/2}$ ), which is obtained from the following equation:  $-Z'' = \sigma \omega^{-1/2}$ . To get  $\sigma$ , the electrochemical impedance spectroscopy (EIS) measurements were measured by CHI760e electrochemical workstation (CH, Shanghai, China) with the frequency ranging from  $10^{-2}$  to  $10^5 \text{ Hz}$  with an alternating current amplitude of  $5 \text{ mV}$ .

Furthermore, galvanostatic intermittent titration (GITT) profiles were tested. The loading mass of Lithium-selenium cathode and Li-S cathode is  $0.7 \text{ mg}$  and  $1.2 \text{ mg}$  respectively. Each step was composed of  $10 \text{ min}$  discharge or charge pulse at a current density of  $0.1 \text{ A g}^{-1}$ , followed by  $1 \text{ hour}$  of shelved. The Li ion diffusion coefficient is

$$D_{Li^+} = \frac{4}{\pi \tau} \left( \frac{m_B}{\rho S} \right)^2 \left( \frac{\Delta E_s}{\Delta E_t} \right)^2$$

calculated by the following equation:

$\Delta E_s$  between two equilibrium potentials, and  $\Delta E_t$  is the difference between the potentials before and after the pulse. Where  $S$  stand for the area of contact between electrode and electrolyte,  $\tau$  is the constant current pulse time,  $m_B$  is the active mass,  $\rho$  is the density of active material.

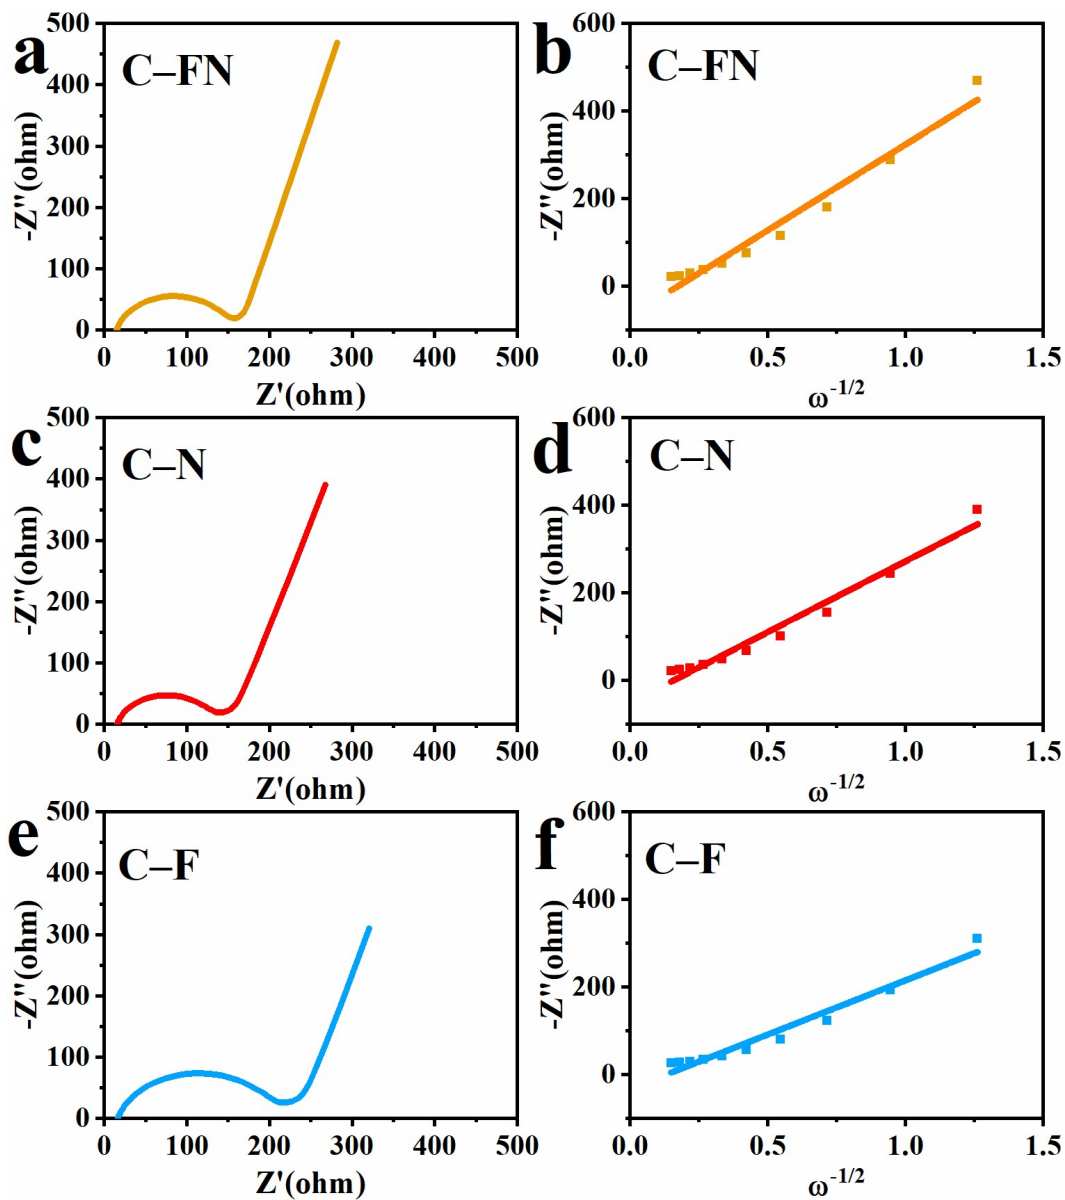

Figure S7 (a, c and e) The EIS spectra and (b, d and f) the relationship lines between  $Z''$  and  $\omega^{-1/2}$  in the low frequency of Li-O2 batteries base on C-FN, C-N and C-F cathodes.

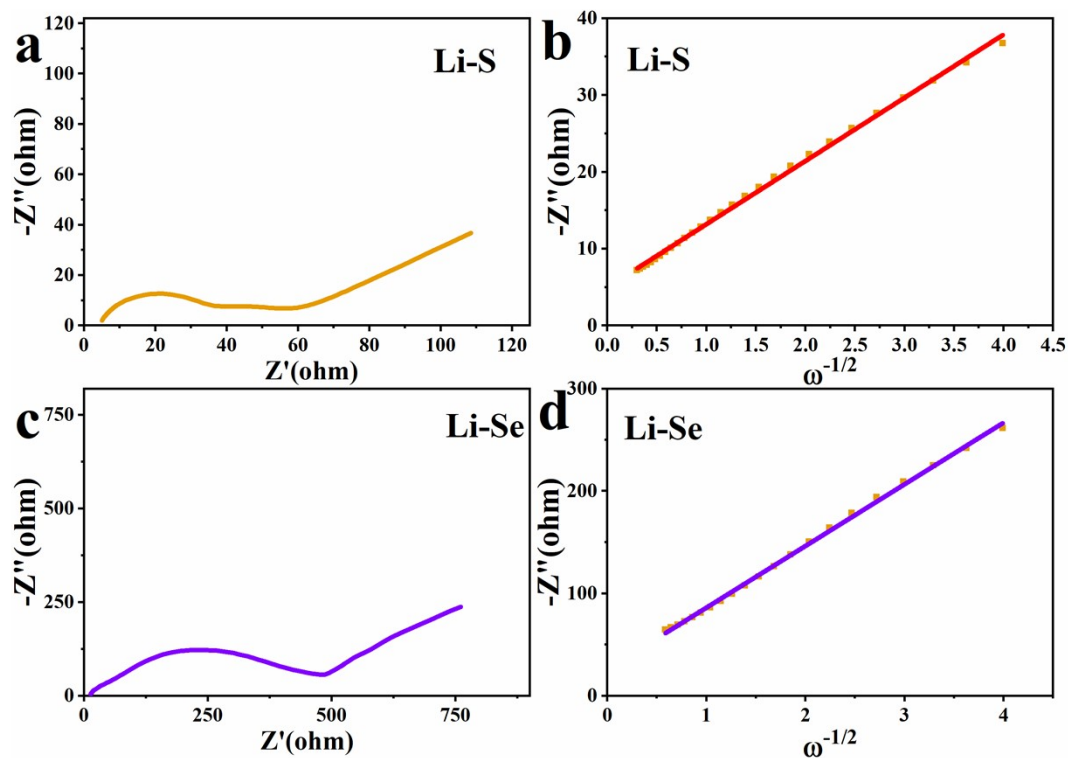

Figure S8 (a, and c) The EIS spectra and (b and d) the relationship lines between  $Z''$  and  $\omega^{-1/2}$  in the low frequency of Li-S and Li-Se batteries.

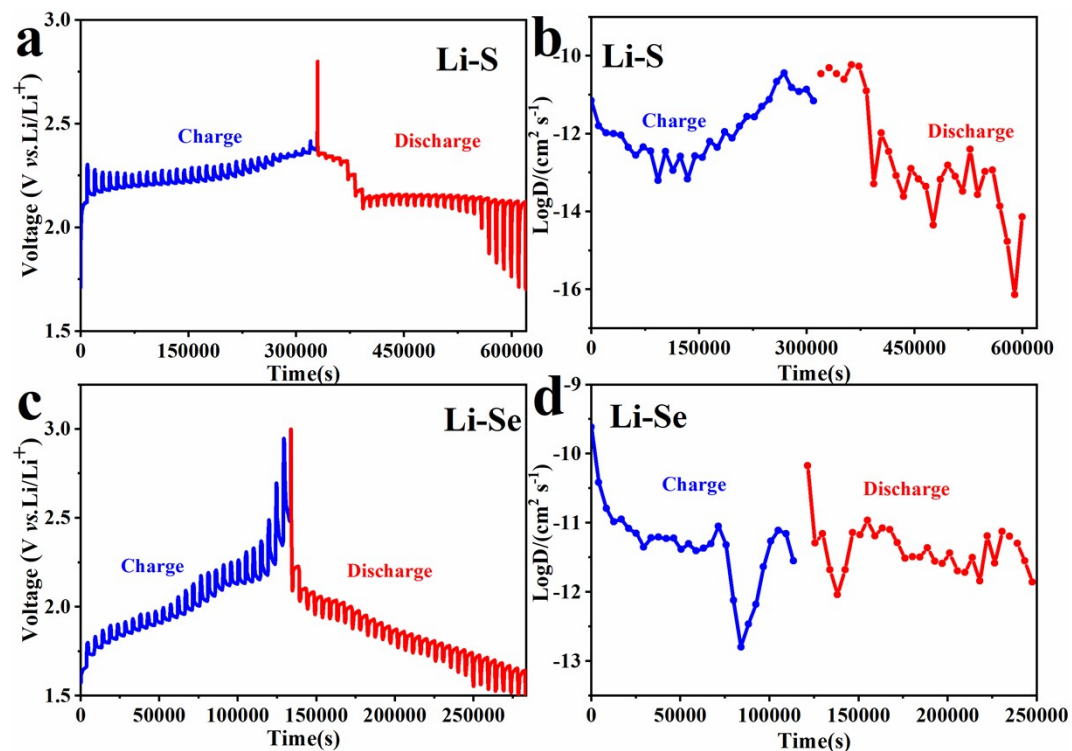

Figure S9 GITT curves and diffusion coefficient of Li-S battery (a and b) and Li-Se battery (c and d)



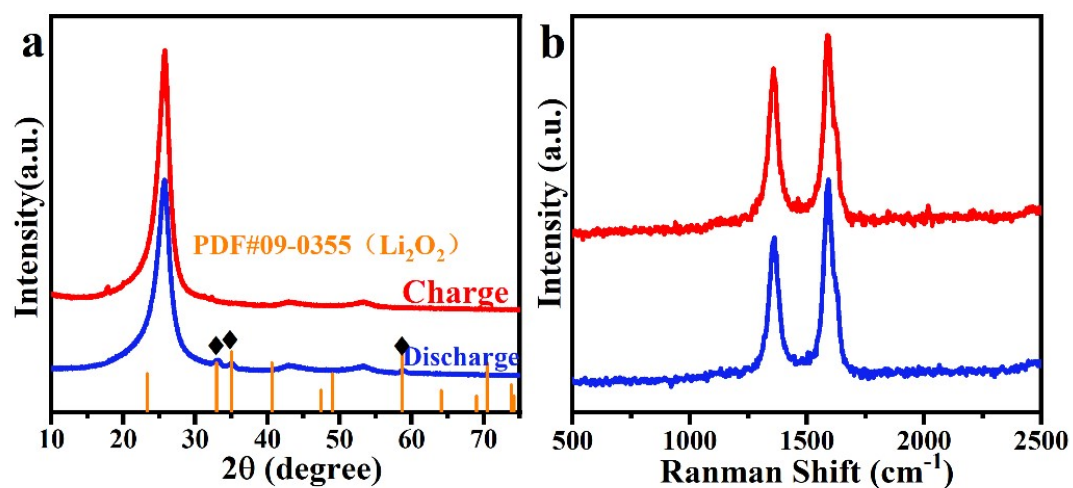

Figure S10 (a) XRD and (b) Raman patterns of C-FN based  $\text{Li-O}_2$  battery cathodes at full charge and discharge stages.

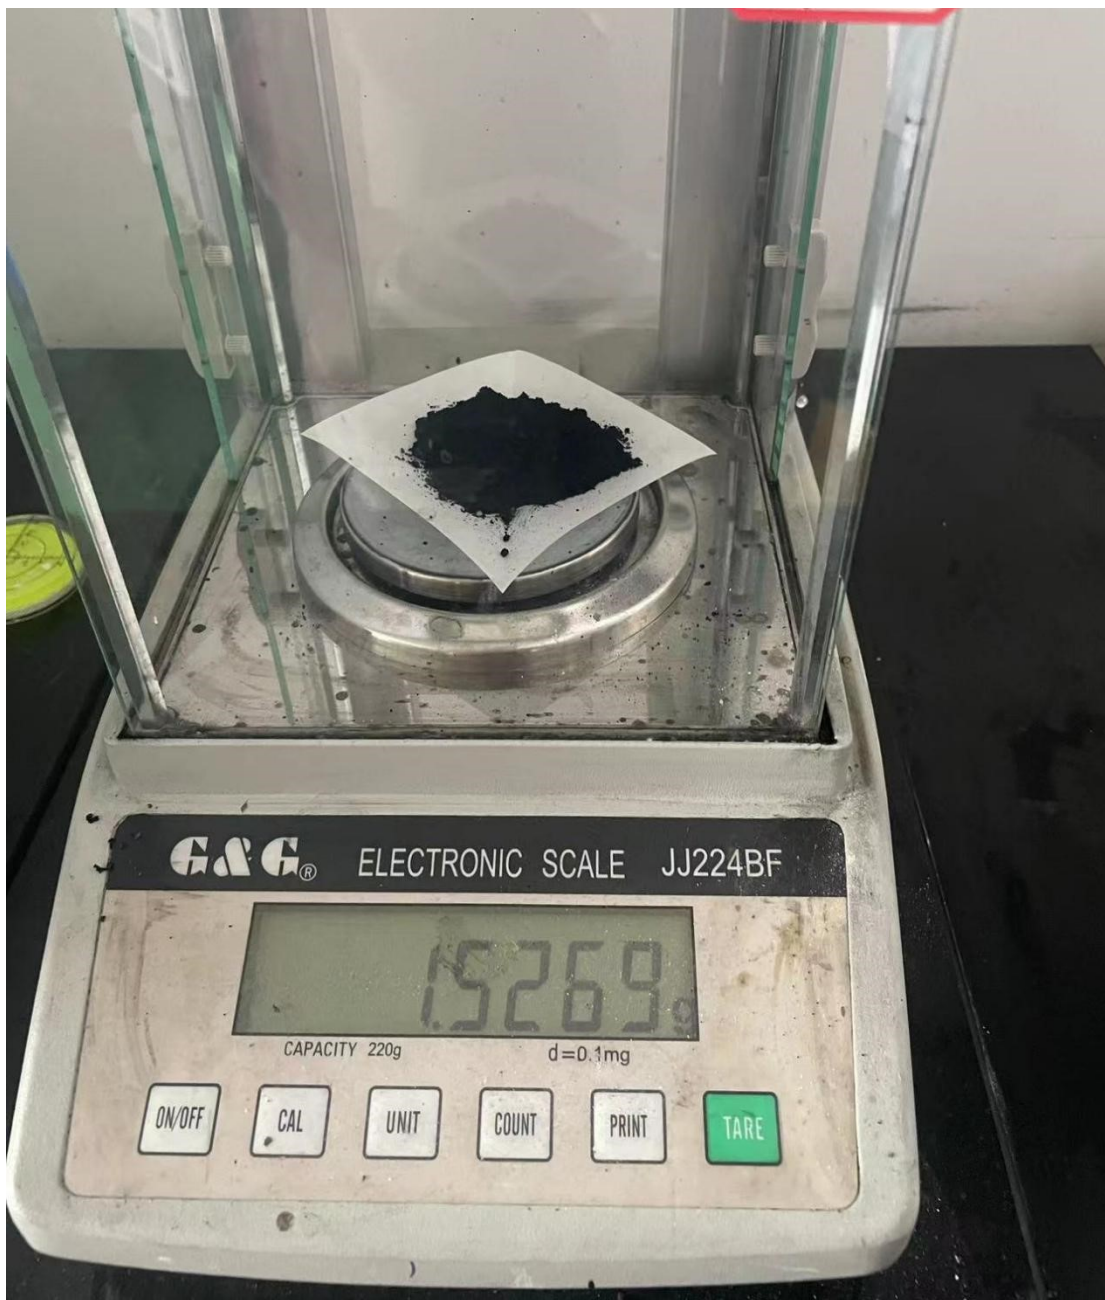

**Figure S11.**The photograph of 1.5 g C-FN.
